# Supplementary material
Source: Springer Nature journal article supplement (https://www.springermedizin.de/resource/supplementary/12936_2007_387_MOESM3_ESM.pdf/9547694)

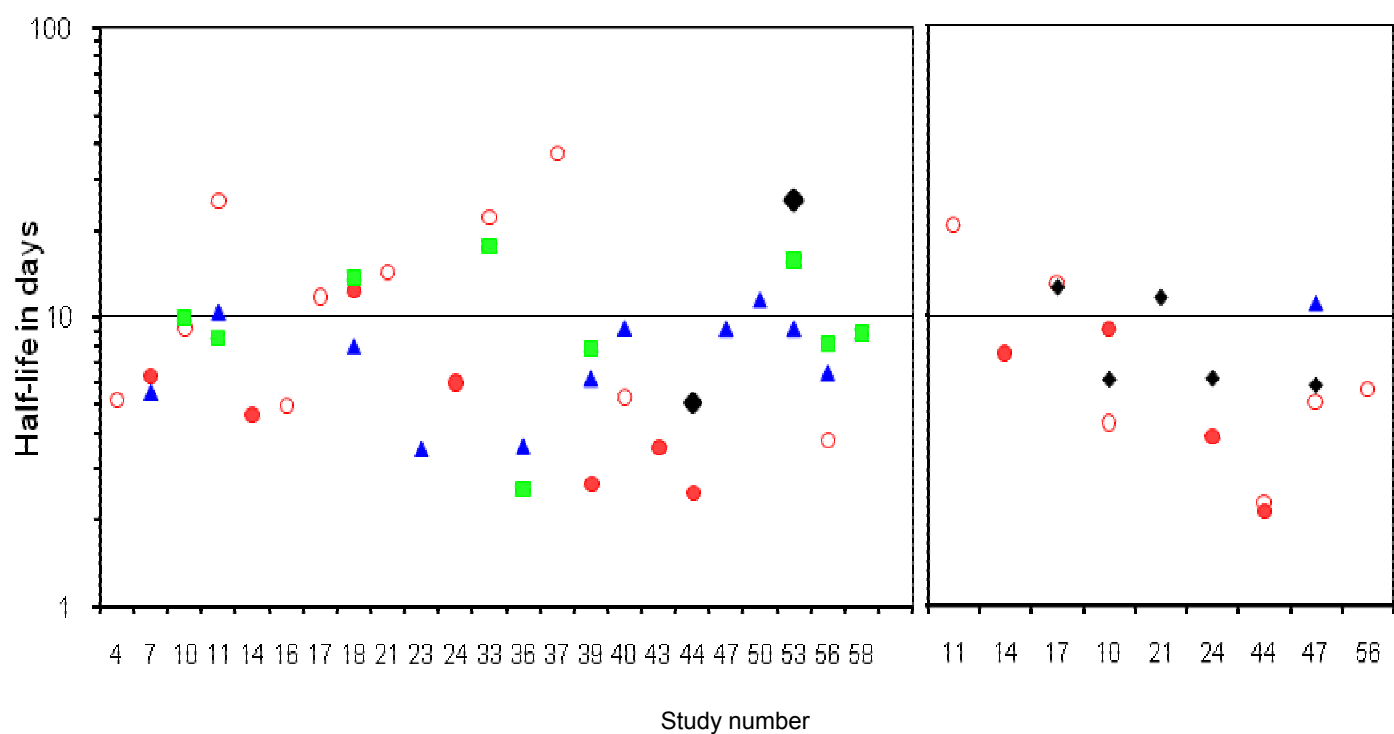

▲ - MSP1-19

● - MSP2-type 1

○ - MSP2-type 1

■ - EBA175 RII

◆ - AMA1

Supplement: MOESM3 [file 9547694]
